# Supplementary material
Source: publisher figshare collection journal article supplement (https://acs.figshare.com/ndownloader/files/4668607)

## Supporting Information for

### Ionic Strength Dependent Effects in Protein Folding: Analysis of Rate Equilibrium Free Energy Relationships and Their Interpretation

Benben Song, Jae-Hyun Cho and Daniel P. Raleigh

**Figure S1.** Plots of the measured ellipticity vs. [urea] showing the fits. (A) from left to right 0M, 0.25M, 0.5M, 0.75M, 1M and 1.5M added NaCl; (B) from left to right 0.025M, 0.05M, 0.1M and 0.15M added NaCl. All experiments were conducted at pH 5.5, 25°C in 20mM NaAc. Data was analyzed as described in the Materials and Methods. Direct curve fitting was used to estimate  $\Delta G^0$  for data at and below 1M salt.

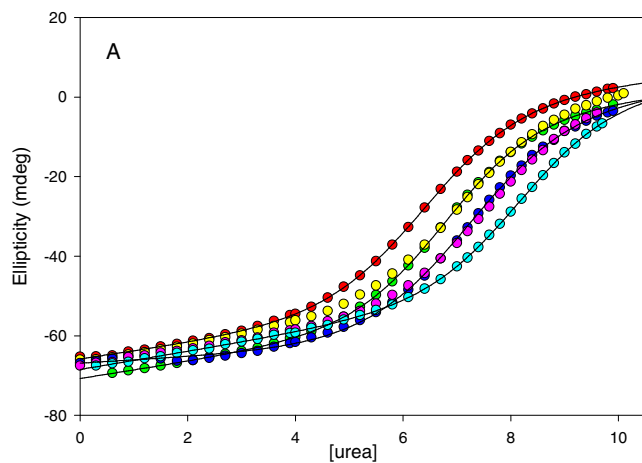

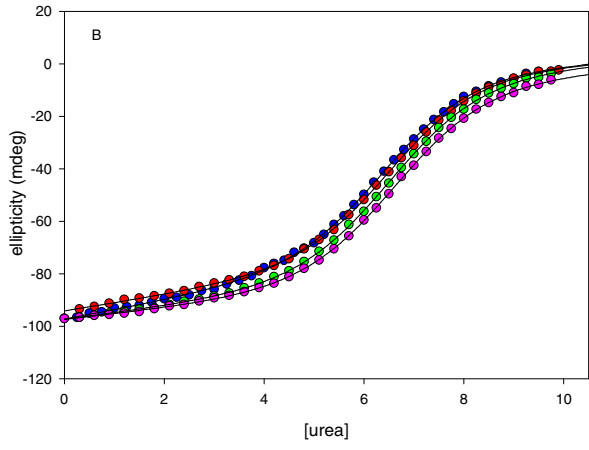

Supplement: Supplementary file 1 [file 4668607]
